# Supplementary material for: Pre-treatment of Single and Double Antiplatelet and Anticoagulant With Intravenous Thrombolysis for Older Adults With Acute Ischemic Stroke: The TTT-AIS Experience
Source: Frontiers journal article supplement (doi:10.3389/fneur.2021.628077), 2021-02-22
Supplement: Data_Sheet_1.PDF [file Data_Sheet_1.PDF]

Supplemental Table 1. Characteristics of Patients Receiving Antiplatelets of Dipyridamole and Cilostazol Before Intravenous Thrombolysis (Total N = 10)

|                            | Dipyridamole<br>(n=4) | Cilostazol<br>(n=6) | Other AP<br>(n=10) |
|----------------------------|-----------------------|---------------------|--------------------|
| Age (years)                | 68.0 ± 5.1            | 76.3 ± 12.3         | 73.0 ± 10.6        |
| Age groups (years)         |                       |                     |                    |
| 60–69 years                | 75.0% (3/4)           | 33.3% (2/6)         | 50.0% (5/10)       |
| 70–79 years                | 25.0% (1/4)           | 33.3% (2/6)         | 30.0% (3/10)       |
| 80–89 years                | 0% (0/4)              | 16.7% (1/6)         | 10.0% (1/10)       |
| ≥90 years                  | 0% (0/4)              | 16.7% (1/6)         | 10.0% (1/10)       |
| Female sex (%)             | 25.0% (1/4)           | 66.7% (4/6)         | 50.0% (5/10)       |
| Comorbidity (%)            |                       |                     |                    |
| Hypertension               | 75.0% (3/4)           | 83.3% (5/6)         | 80.0% (8/10)       |
| Diabetes                   | 50.0% (2/4)           | 50.0% (3/6)         | 50.0% (5/10)       |
| Hyperlipidemia             | 25.0% (1/4)           | 16.7% (1/6)         | 20.0% (2/10)       |
| Atrial fibrillation        | 0% (0/2)              | 33.3% (2/6)         | 25.0% (2/8)        |
| Alcoholism                 | 0% (0/4)              | 16.7% (1/6)         | 10.0% (1/10)       |
| Glucose (mg/dl)            | 231.0 ± 124.5         | 124.8 ± 15.3        | 151.4 ± 69.2       |
| Prothrombin time (INR)     | 1.00 ± 0.00           | 1.00 ± 0.06         | 1.00 ± 0.05        |
| aPTT                       | 25.6 ± 3.3            | 27.3 ± 1.7          | 26.8 ± 2.1         |
| Systolic BP (mmHg)         | 158.0 ± 7.1           | 145.2 ± 27.2        | 148.4 ± 23.9       |
| Diastolic BP (mmHg)        | 98.0 ± 7.1            | 83.0 ± 10.2         | 86.8 ± 11.4        |
| Baseline NIHSS             | 11.0 ± 6.4            | 15.5 ± 9.4          | 13.7 ± 8.3         |
| Alteplase dose (mg/kg)     | 0.75 ± 0.10           | 0.73 ± 0.12         | 0.74 ± 0.11        |
| Standard dose (0.9 mg/kg)  | 25.0% (1/4)           | 0% (0/6)            | 10.0% (1/10)       |
| Low dose (<0.9 mg/kg)      | 75.0% (3/4)           | 100.0% (6/6)        | 90.0% (9/10)       |
| Onset to needle time (min) | 72.5 ± 84.6           | 138.7 ± 52.4        | 112.2 ± 71.3       |

Abbreviations: AP, antiplatelet; aPTT, activated partial thromboplastin time; BP, blood pressure; INR, international normalized ratio; NIHSS, the National Institute of Health Stroke Scale

Table 2. Functional Outcome at 3 months (3m).

| Functional outcomes       | Dipyridamole<br>(n=2) | Cilostazol<br>(n=6) | Other AP<br>(n=8) |
|---------------------------|-----------------------|---------------------|-------------------|
| SICH per NINDS (%)        | 0% (0/2)              | 0% (0/6)            | 0% (0/10)         |
| SICH per ECASS II (%)     | 0% (0/2)              | 0% (0/6)            | 0% (0/10)         |
| mRS of 0–1 at 90 days (%) | 0% (0/2)              | 16.7% (1/6)         | 12.5% (1/8)       |
| mRS of 0–2 at 90 days (%) | 50.0% (1/2)           | 16.7% (1/6)         | 25.0% (2/8)       |
| Death at 90 days (%)      | 0% (0/2)              | 0% (0/6)            | 0% (0/8)          |

Abbreviations: AP, antiplatelet; ECASS II, the European-Australasian Acute Stroke Study II; mRS, modified Rankin Scale; NINDS, National Institute of Neurological Disorders and Stroke Study; SICH, symptomatic intracranial hemorrhage
